# Supplementary material for: Metallopolymer-based block copolymers for perfluorinated substances (PFAS) and ion removal
Source: Royal Society of Chemistry journal article supplement (doi:10.1039/d4tc03546a), 2024-01-01
Supplement: d4tc03546a1.pdf [file d4tc03546a1.pdf]

## Supporting information

### Metallopolymer-Based Block Copolymers for Perfluorinated Substances (PFAS) and Ion Removal

Till Rittner,<sup>a</sup> Sebastian Pusse,<sup>a</sup> Blandine Boßmann,<sup>a</sup> Kevin Staudt,<sup>b</sup> Aaron Haben,<sup>c</sup> Ralf Kautenburger,<sup>c</sup> Horst P. Beck,<sup>d</sup> and Markus Gallei<sup>a,e\*</sup>

<sup>a</sup> Polymer Chemistry, Saarland University, Campus C4 2, 66123, Saarbrücken, Germany

<sup>b</sup> Physical Chemistry, Saarland University, Campus B2 2, 66123 Saarbrücken, Germany

<sup>c</sup> Inorganic Solid State Chemistry, Elemental analysis group, Saarland University, Campus C4 1, 66123, Saarbrücken, Germany

<sup>d</sup> Inorganic and Analytical Chemistry, Saarland University, Campus Dudweiler, 66125, Beethovenstrasse Zeile 4

<sup>e</sup> Saarene, Saarland Center for Energy Materials and Sustainability, Campus C4 2, 66123, Saarbrücken, Germany

### Directory

|                                                                                           |    |
|-------------------------------------------------------------------------------------------|----|
| 1.-Polymers and Nomenclature.....                                                         | 2  |
| 2.-Proton Nuclear Resonance Spectroscopy ( <sup>1</sup> H-NMR) of prepared Polymers ..... | 3  |
| 3.-Size Exclusion Chromatography (SEC) of prepared Polymers .....                         | 6  |
| 4.-Photographs of Prepared Membranes and SEM Images of the Membrane Surface .....         | 8  |
| 5.-Additional Permeance Experiments in Simulated Seawater .....                           | 10 |
| 6.-Cyclic Voltammetry Data .....                                                          | 11 |
| 7.-Thermogravimetric Analysis Data and Ceramic in Synthetic Air .....                     | 12 |
| 8.-Ceramic Composition and Mapping via Energy-dispersive X-ray Spectroscopy (EDS) .....   | 13 |

## 1.-Polymers and Nomenclature

Table S1: Summarized molar masses and block segment content (weight content (wt.%),  $P_{XX}$  wt%) of PtBAEMA and PCoEtBAEMA of synthesized polymers calculated by SEC measurements and  $^1\text{H}$  NMR spectroscopy.

| Sample            | Polymer                                                                                   | $M_{n, NMR}$ <sup>a)</sup> | $\bar{D}$ <sup>b)</sup> | wt.% <sub>PCoEtBAEMA(UV-Vis)</sub> <sup>c)</sup> |
|-------------------|-------------------------------------------------------------------------------------------|----------------------------|-------------------------|--------------------------------------------------|
| P <sub>6.2</sub>  | PS <sub>797</sub> - <i>b</i> -(PCoEtBAEMA <sub>7</sub> - <i>co</i> -PMMA <sub>8</sub> )   | 87.8                       | 1.08                    | 6.2                                              |
| P <sub>20.1</sub> | PS <sub>773</sub> - <i>b</i> -(PCoEtBAEMA <sub>31</sub> - <i>co</i> -PMMA <sub>12</sub> ) | 98.7                       | 1.08                    | 20.1                                             |
| P <sub>27.5</sub> | PS <sub>908</sub> - <i>b</i> -(PCoEtBAEMA <sub>65</sub> - <i>co</i> -PMMA <sub>28</sub> ) | 134.4                      | 1.10                    | 27.5                                             |
| P <sub>31.1</sub> | PS <sub>773</sub> - <i>b</i> -(PCoEtBAEMA <sub>57</sub> - <i>co</i> -PMMA <sub>27</sub> ) | 114.4                      | 1.11                    | 31.1                                             |
| P <sub>33.3</sub> | PS <sub>874</sub> - <i>b</i> -(PCoEtBAEMA <sub>68</sub> - <i>co</i> -PMMA <sub>48</sub> ) | 143.3                      | 1.10                    | 33.3                                             |
| P <sub>40.1</sub> | PS <sub>776</sub> - <i>b</i> -(PCoEtBAEMA <sub>80</sub> - <i>co</i> -PMMA <sub>30</sub> ) | 127.0                      | 1.10                    | 40.1                                             |
| P <sub>92.6</sub> | PCoEtBAEMA <sub>387</sub> - <i>b</i> -PMMA <sub>133</sub>                                 | 225.5                      | 1.07                    | 92.6 <sup>d)</sup>                               |

<sup>a)</sup> PS molar masses were determined by SEC in THF (kg mol<sup>-1</sup>, PS standards) and used to calculate NMR values for the corresponding block copolymers; <sup>b)</sup> Dispersity of polymers prior to functionalization measured by SEC in DMF with styrene standard <sup>c)</sup> Weight content of PCoEtBAEMA in % calculated by UV-Vis spectroscopy in THF at 489 nm <sup>d)</sup> Weight content determined by  $^1\text{H}$  NMR data of the block copolymers.

### Polymer synthesis and data:

A detailed description of the synthetic and analytical procedure, including the composition calculation, can be found in the supporting information of our previous work under DOI:10.1039/D4PY00780H. All newly synthesized polymers for this work (P<sub>27.5</sub>, P<sub>33.3</sub>, and P<sub>92.6</sub>) were analyzed accordingly, and relevant data (NMR and SEC) is presented in the following.

## 2.-Proton Nuclear Resonance Spectroscopy ( $^1\text{H-NMR}$ ) of prepared Polymers

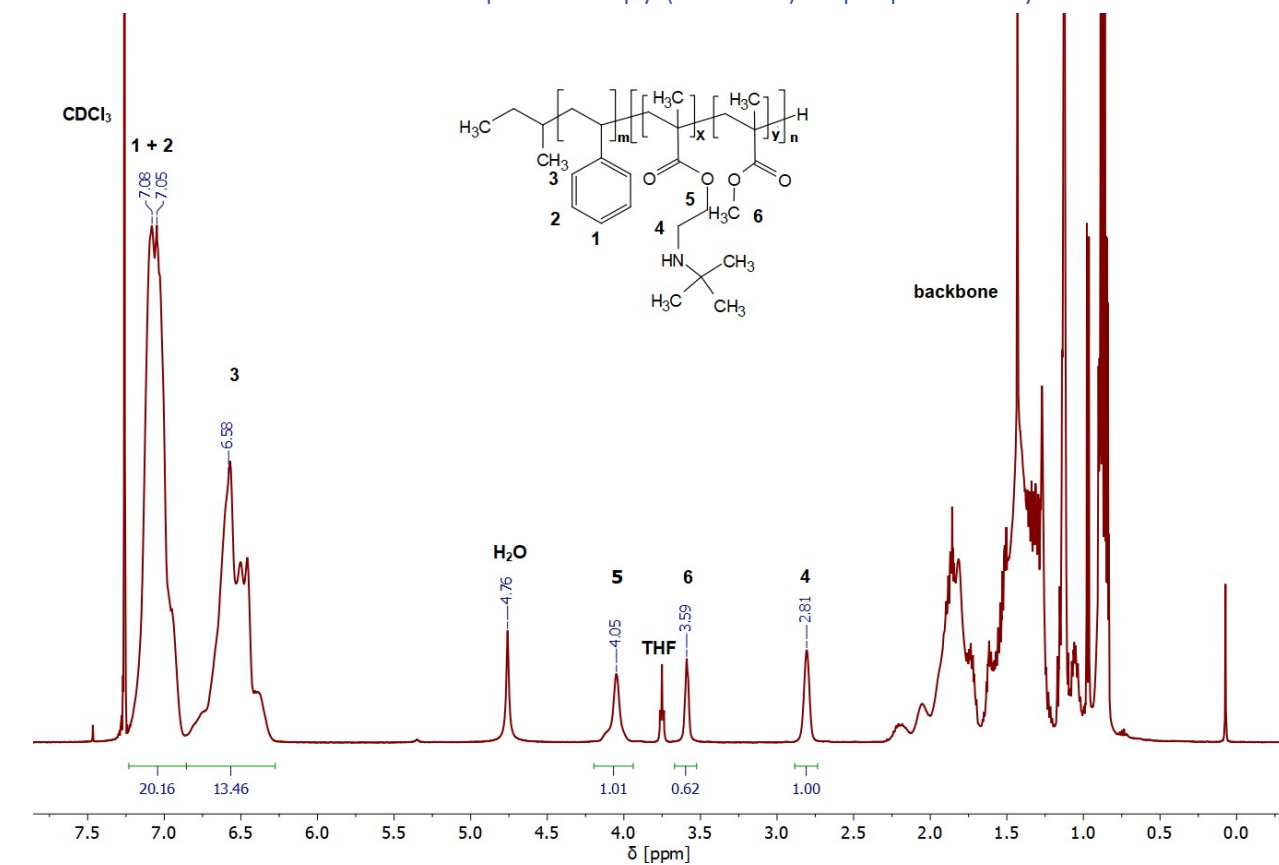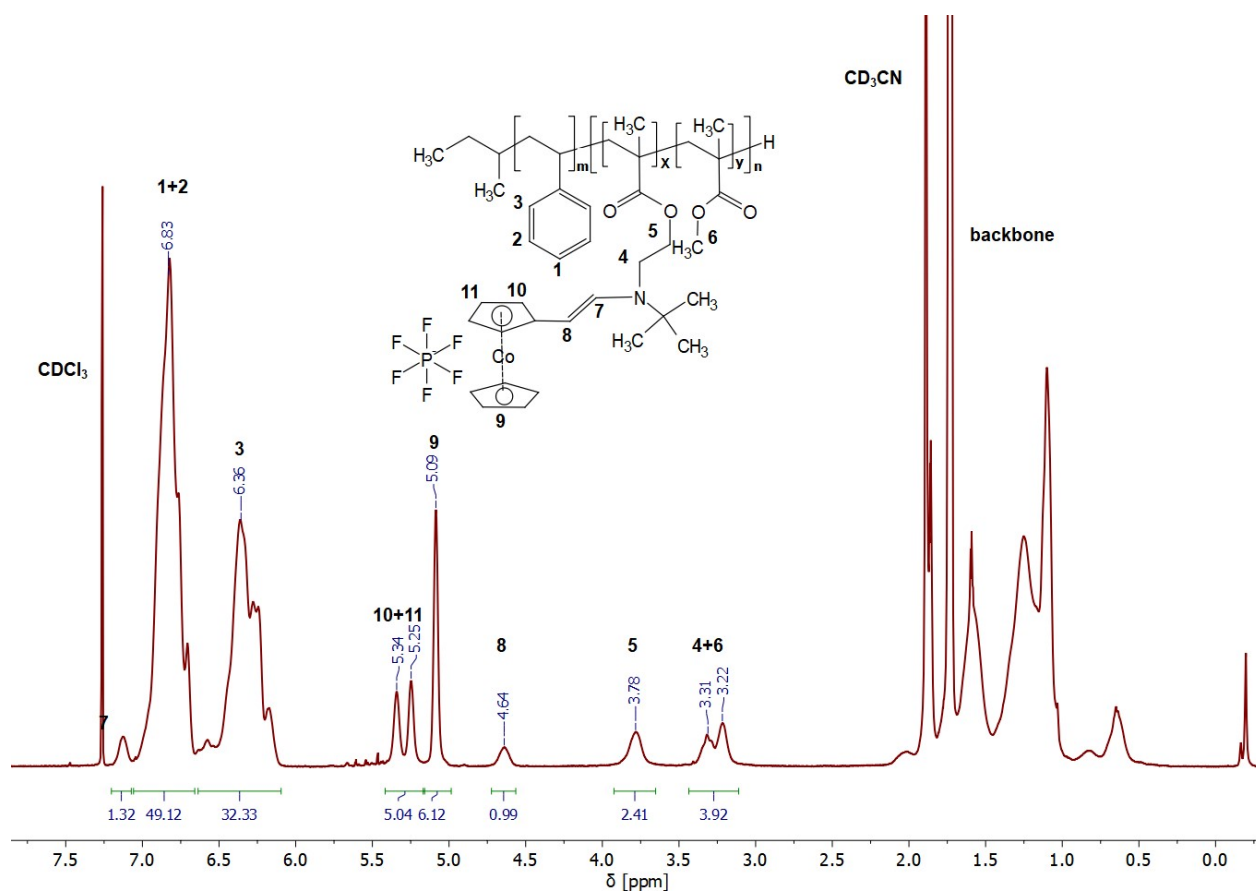

Figure S1:  $^1\text{H-NMR}$  (500 MHz,  $\text{CDCl}_3$ ,  $\delta$  in ppm) of  $\text{PS}_{908}\text{-}b\text{-(PtBAEMA}_{65}\text{-}co\text{-PMMA}_{28})$

Figure S2:  $^1\text{H-NMR}$  (500 MHz,  $\text{CDCl}_3/\text{CDCN}$ ,  $\delta$  in ppm) of  $\text{PS}_{908}\text{-}b\text{-(PCoEtBAEMA}_{65}\text{-}co\text{-PMMA}_{28})$

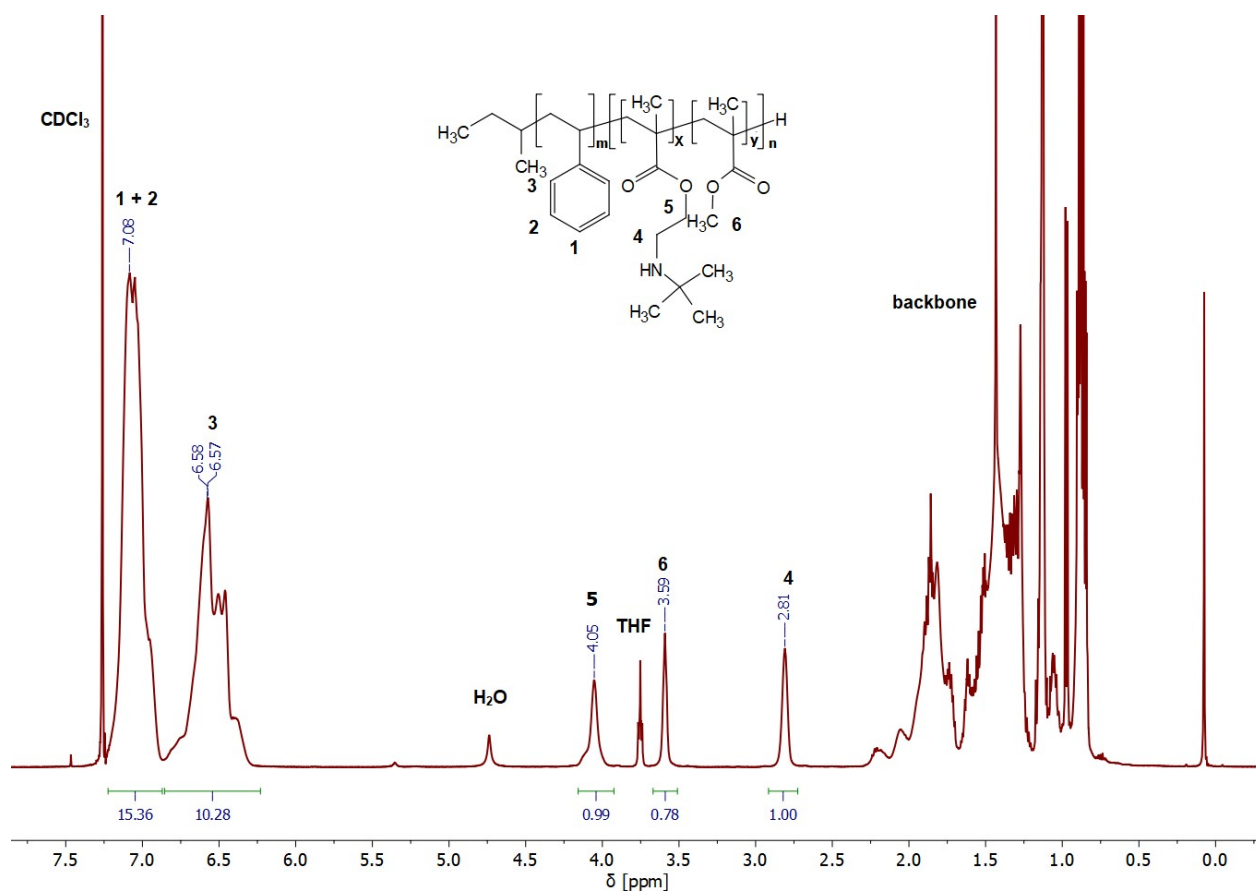

Figure S3:  $^1\text{H-NMR}$  (500 MHz,  $\text{CDCl}_3$ ,  $\delta$  in ppm) of  $\text{PS}_{874}\text{-}b\text{-(PtBAEMA}_{88}\text{-}co\text{-PMMA}_{48})$

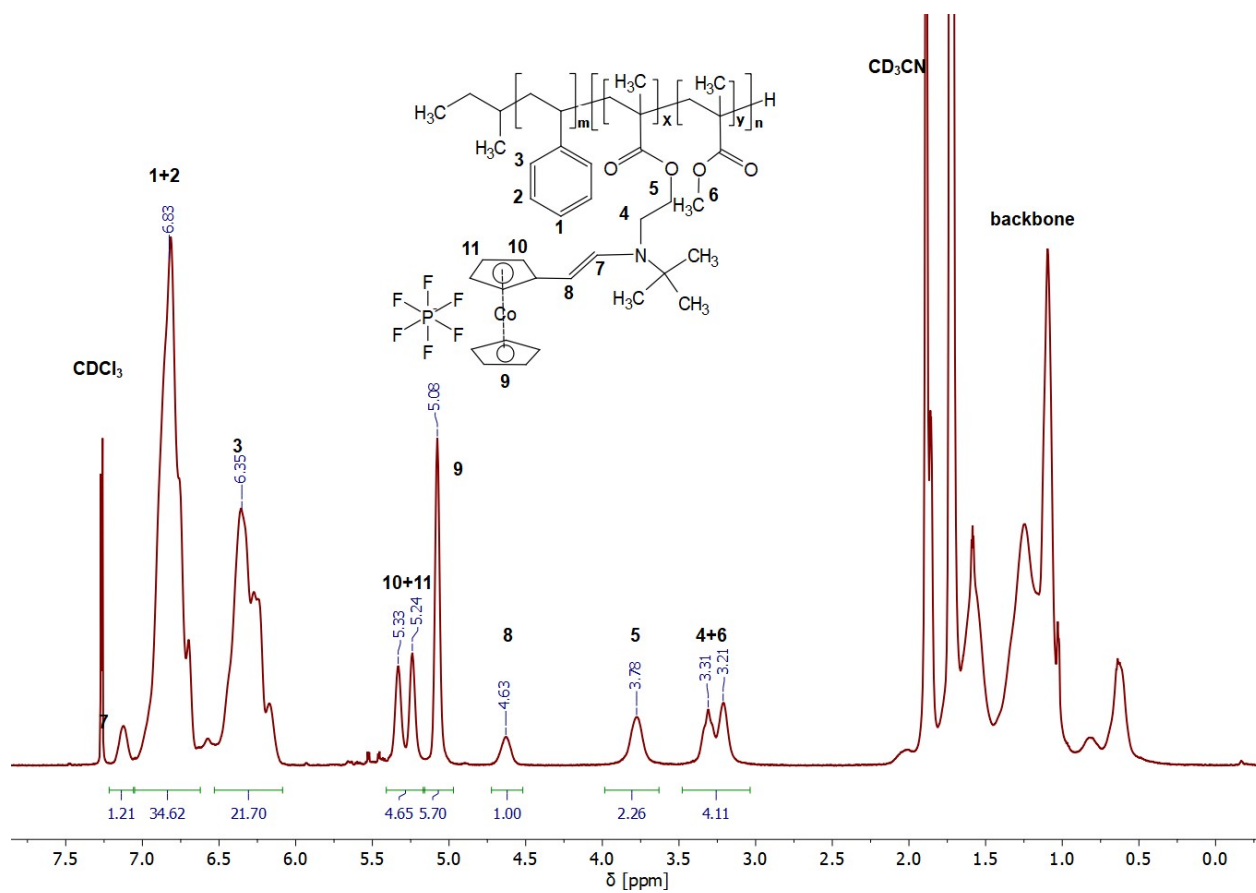

Figure S4:  $^1\text{H-NMR}$  (500 MHz,  $\text{CDCl}_3/\text{CDCl}_2$ ,  $\delta$  in ppm) of  $\text{PS}_{874}\text{-}b\text{-(PCoEtBAEMA}_{88}\text{-co-PMMA}_{48})$

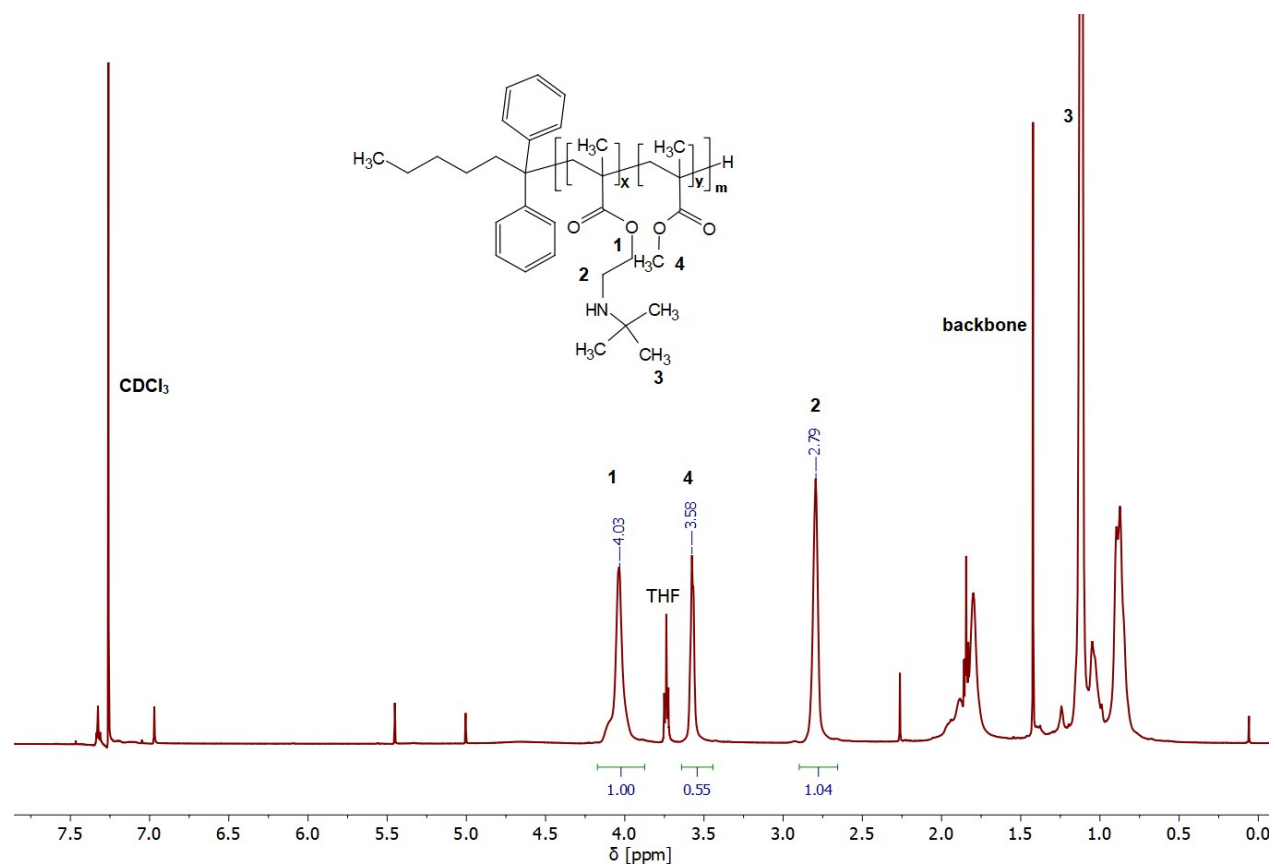

Figure S5: <sup>1</sup>H-NMR (500 MHz, CDCl<sub>3</sub>, δ in ppm) of PtBAEMA<sub>387</sub>-*b*-PMMA<sub>133</sub>

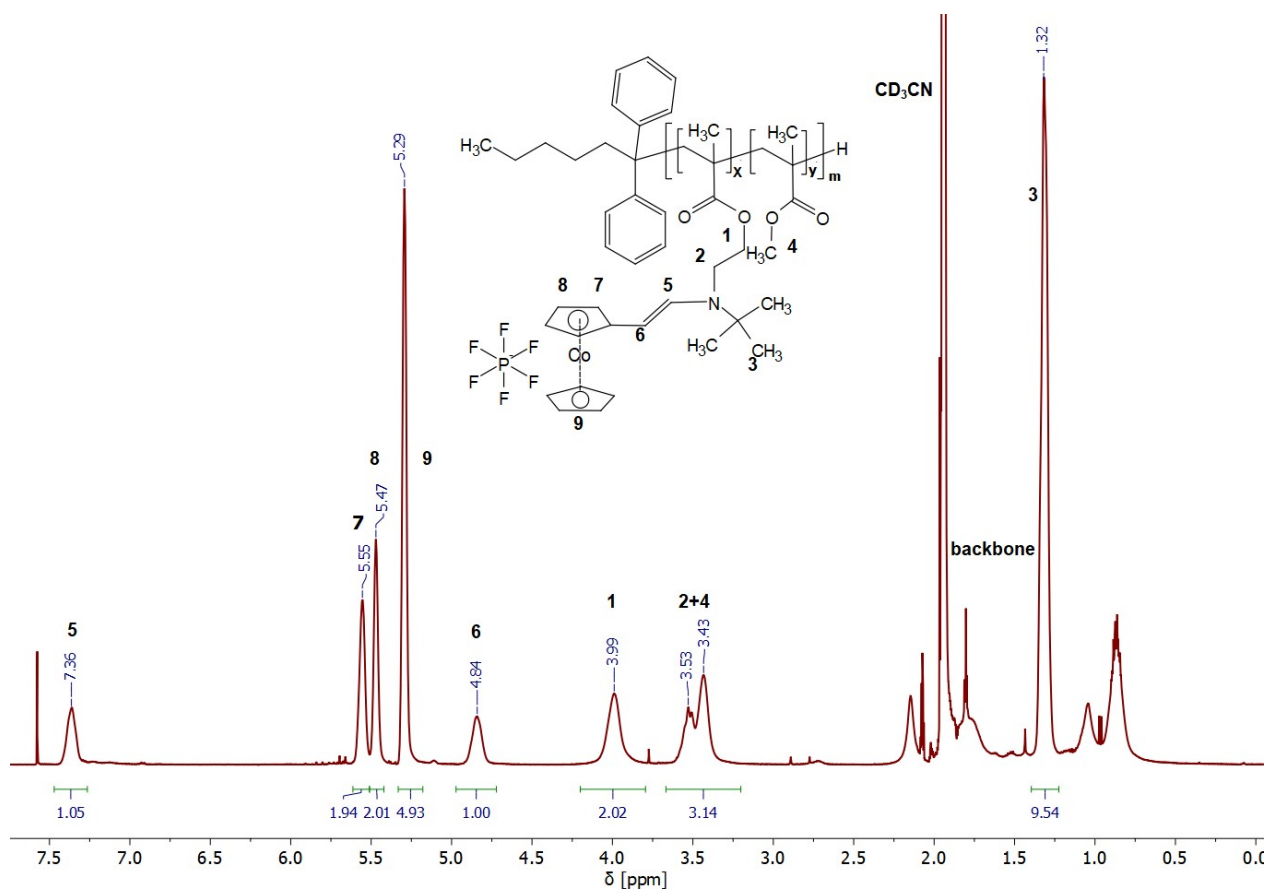

Figure S6: <sup>1</sup>H-NMR (500 MHz, CDCl<sub>3</sub>/CD<sub>3</sub>CN, δ in ppm) of PCoEtBAEMA<sub>387</sub>-*b*-PMMA<sub>133</sub>

### 3.-Size Exclusion Chromatography (SEC) of prepared Polymers

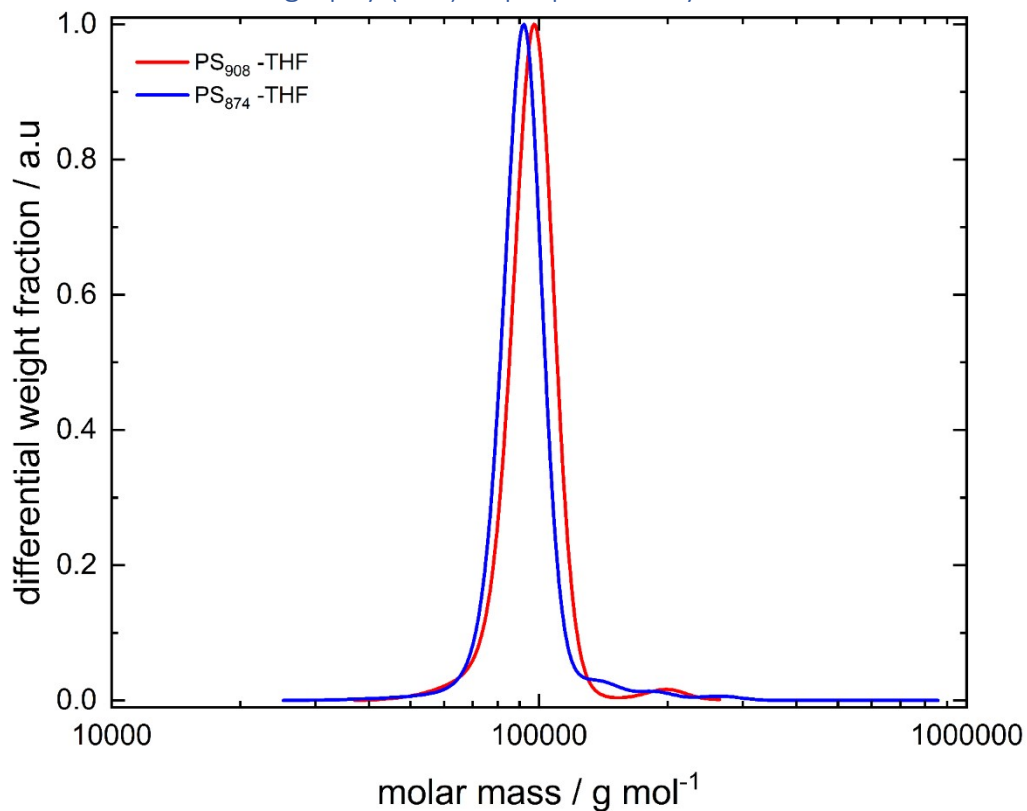

Figure S7: SEC (THF, polystyrene standard) of PS<sub>908</sub> and PS<sub>874</sub> first polystyrene block for calculation

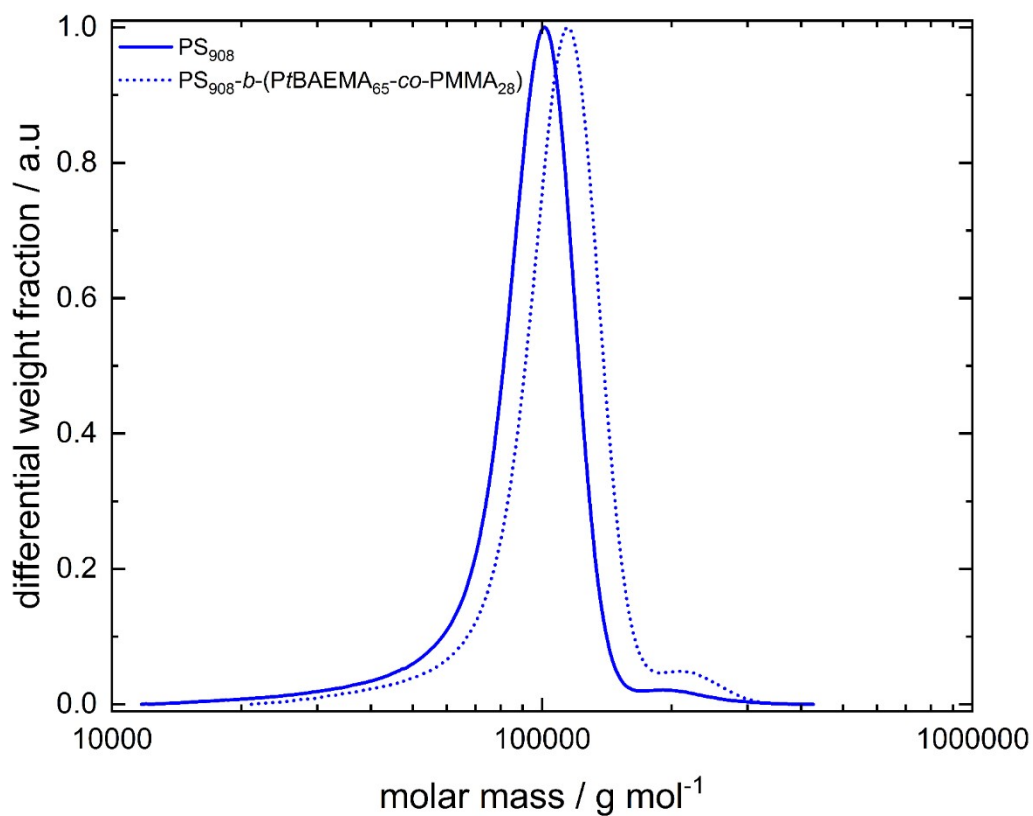

Figure S8: SEC (DMF, PMMA standard) of PS<sub>908</sub> and PS<sub>908</sub>-*b*-(PtBAEMA<sub>65</sub>-*co*-PMMA<sub>28</sub>)

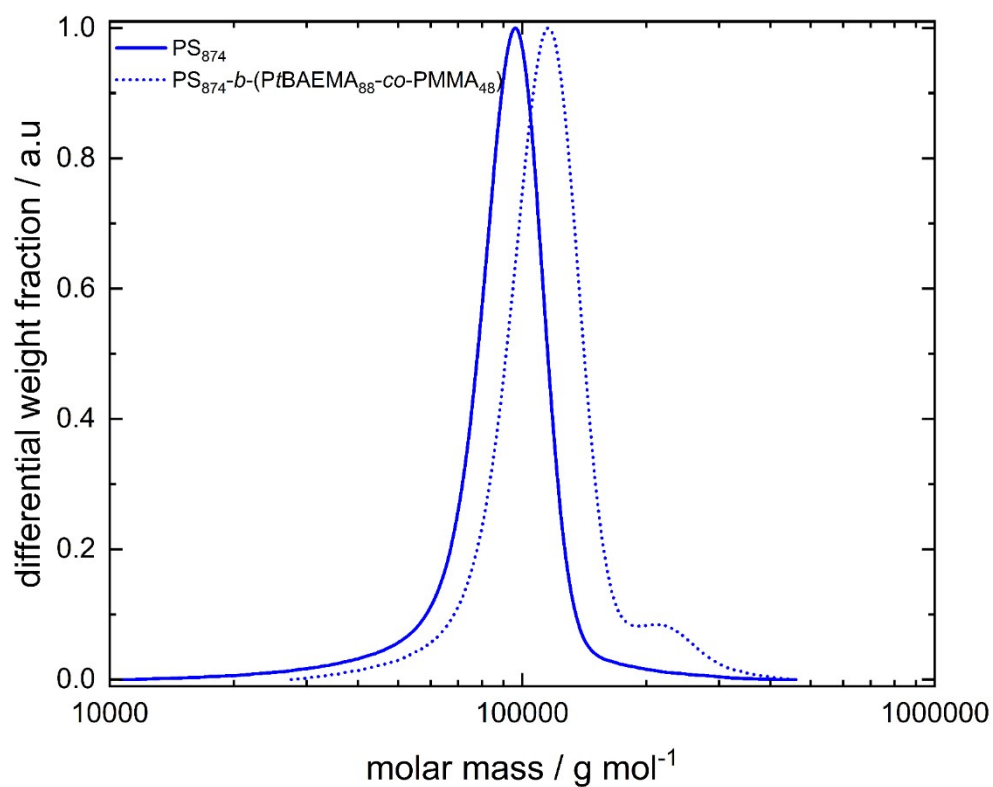

Figure S9: SEC (DMF, PMMA standard) of PS<sub>874</sub> and PS<sub>874</sub>-*b*-(PtBAEMA<sub>88</sub>-*co*-PMMA<sub>48</sub>)

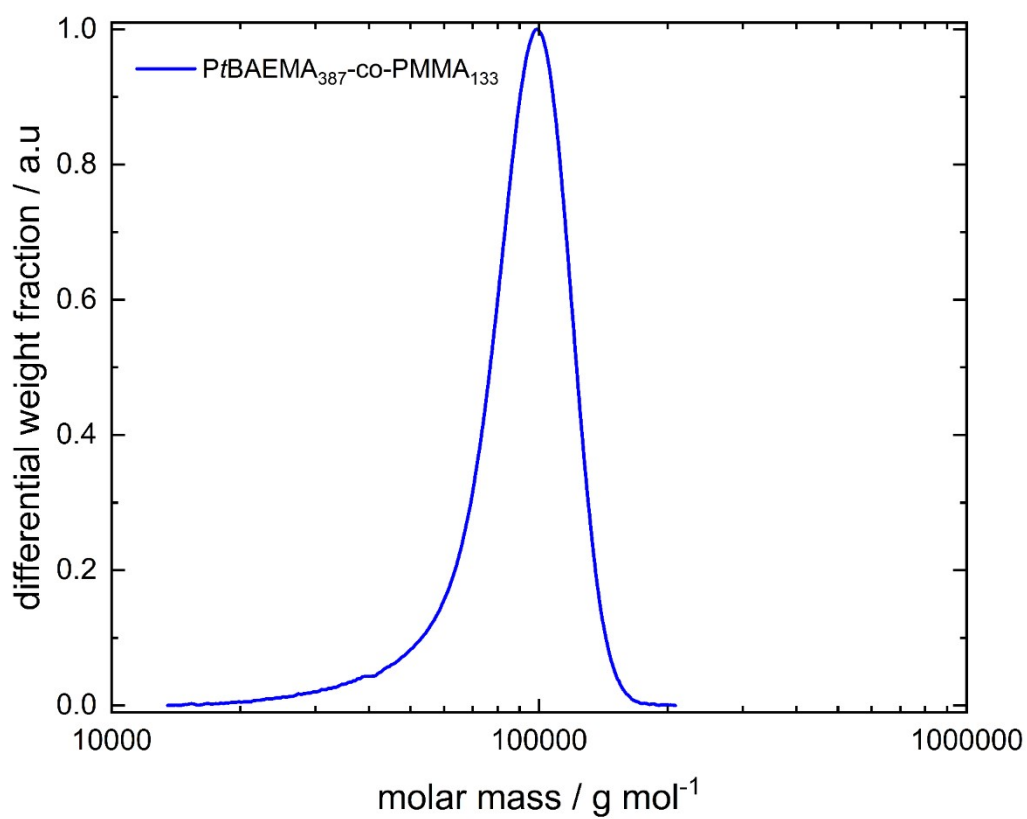

Figure S10: SEC (DMF, PMMA standard) of P(*t*BAEMA<sub>88</sub>-*co*-MMA<sub>48</sub>)



#### 4.-Photographs of Prepared Membranes and SEM Images of the Membrane Surface

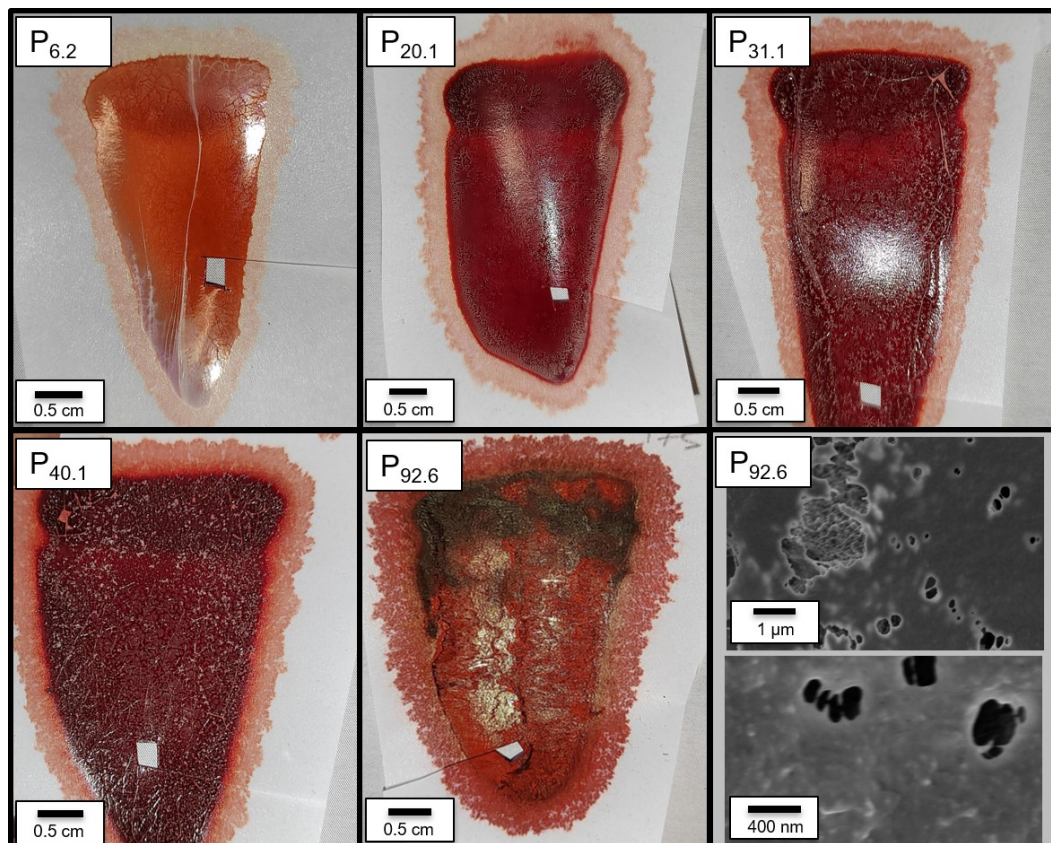

Figure S11: Images of prepared membranes from NMP solution with increasing amount of cobaltocenium containing PtBAEMA in weight percent ( $P_{xx}$  wt%) and scanning electron microscopy images of  $P_{92.6}$ .

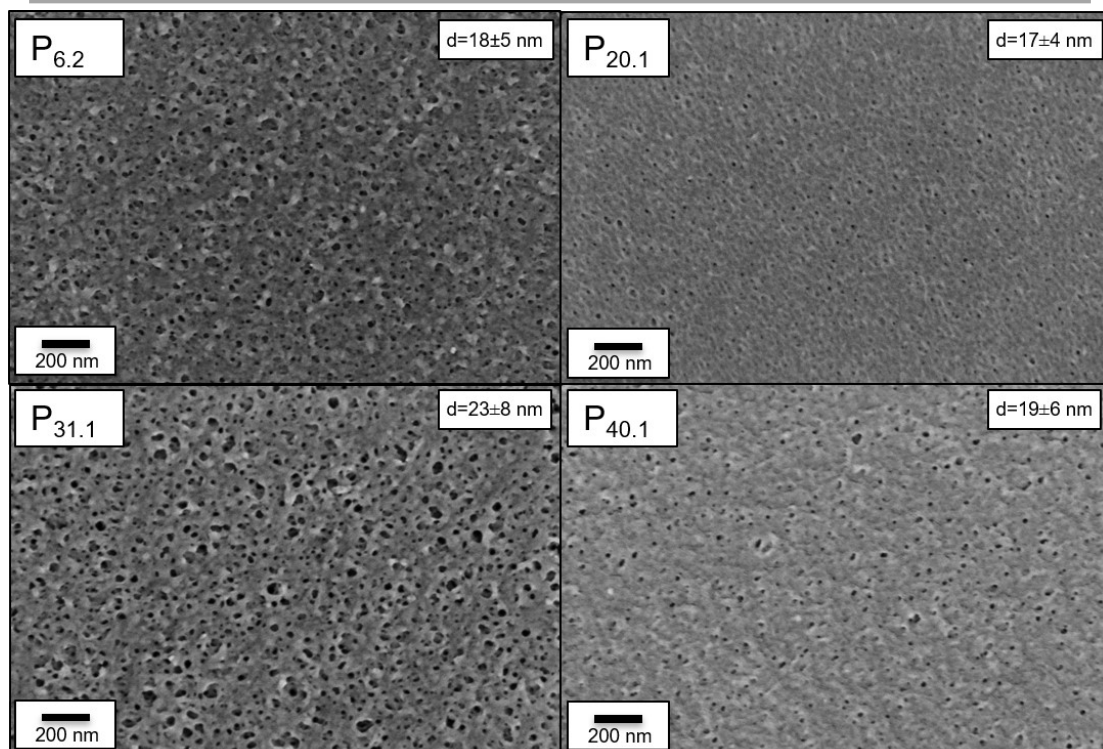

Figure S12: Scanning electron microscopy (SEM) images of membranes from NMP solution with increasing amount of cobaltocenium containing PtBAEMA in weight percent ( $P_{xx}$  wt%)

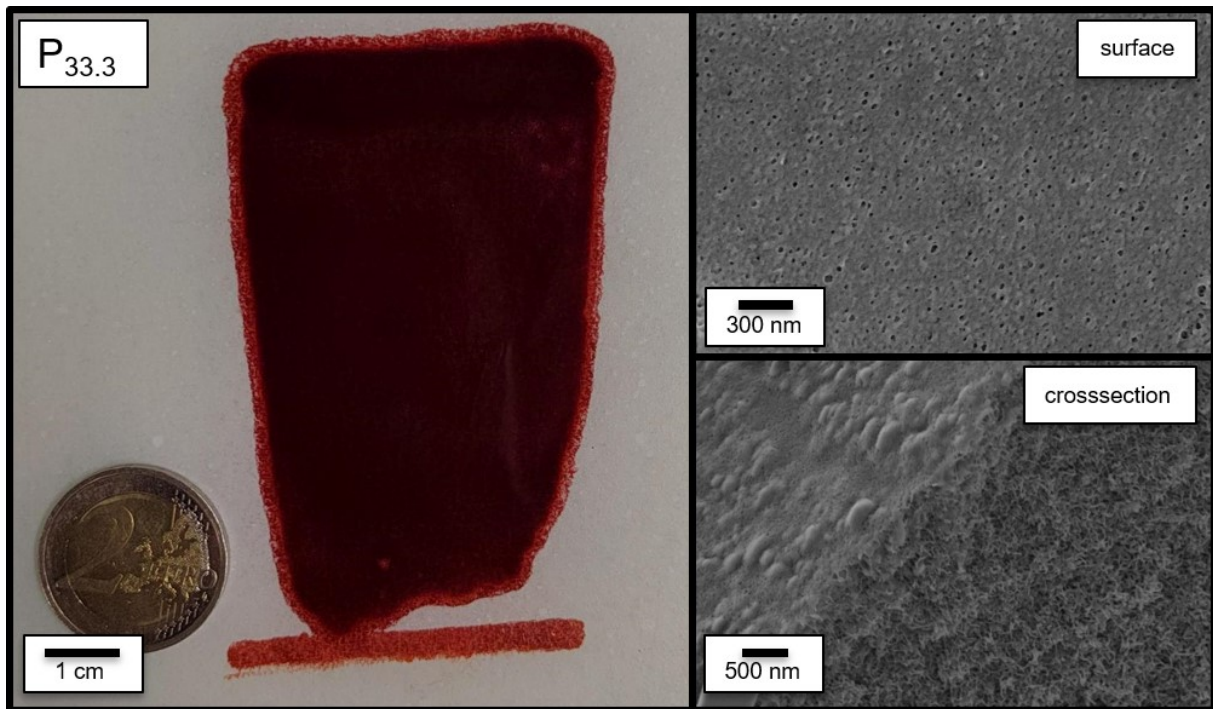

Figure S13: Image of large membrane formed from a DMAC solution of  $P_{33.3}$  and respective scanning electron microscopy images of the surface and crosssection.

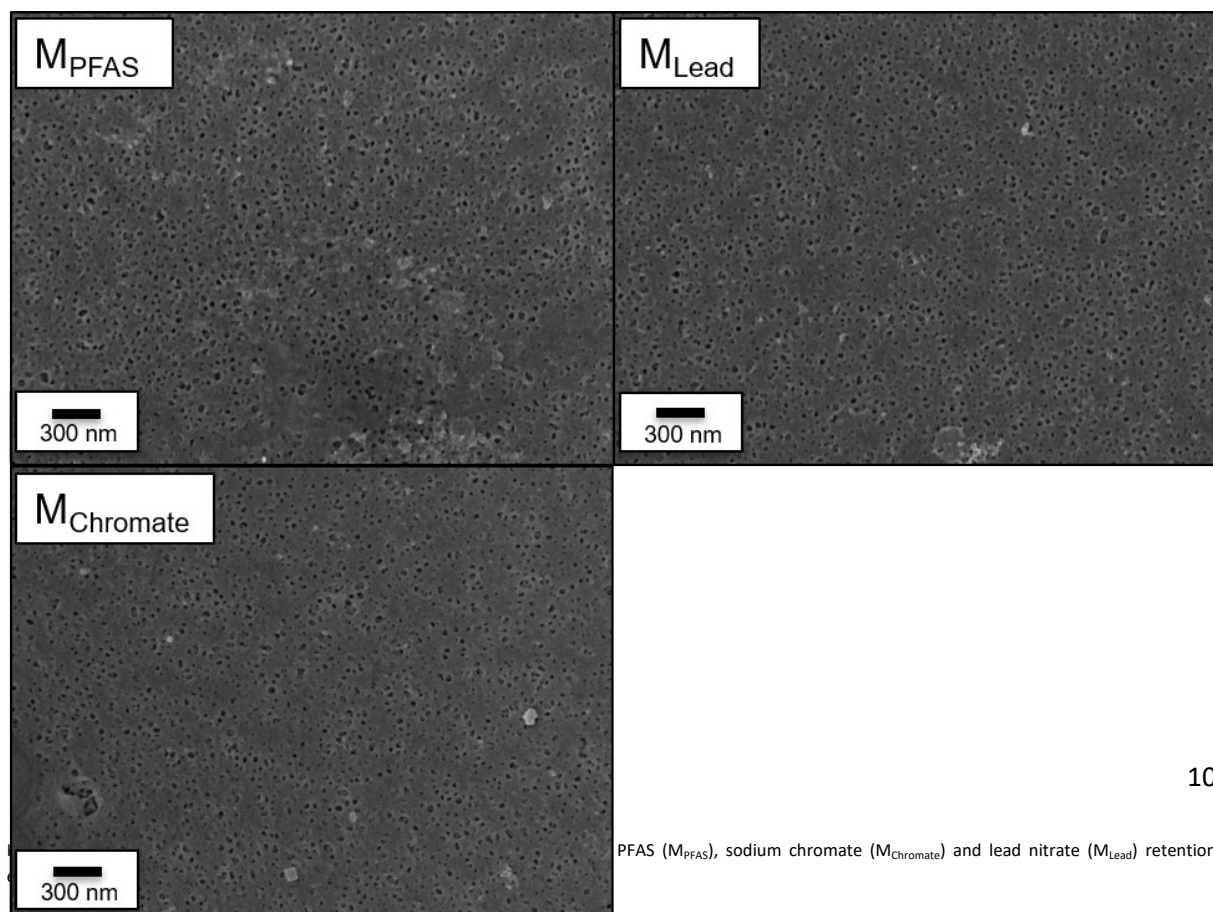

PFAS ( $M_{PFAS}$ ), sodium chromate ( $M_{Chromate}$ ) and lead nitrate ( $M_{Lead}$ ) retention

5.-Additional Permeance Experiments in Simulated Seawater

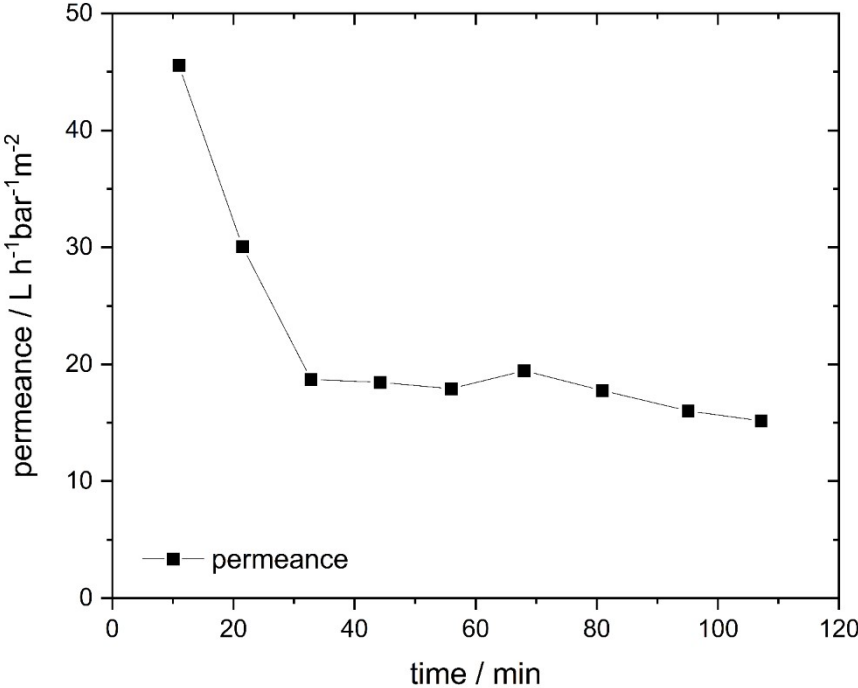

Figure 15: Water flux experiment with a sodium chloride concentration of 3.5 wt% and a pressure of 0.4 bar



## 6.-Cyclic Voltammetry Data

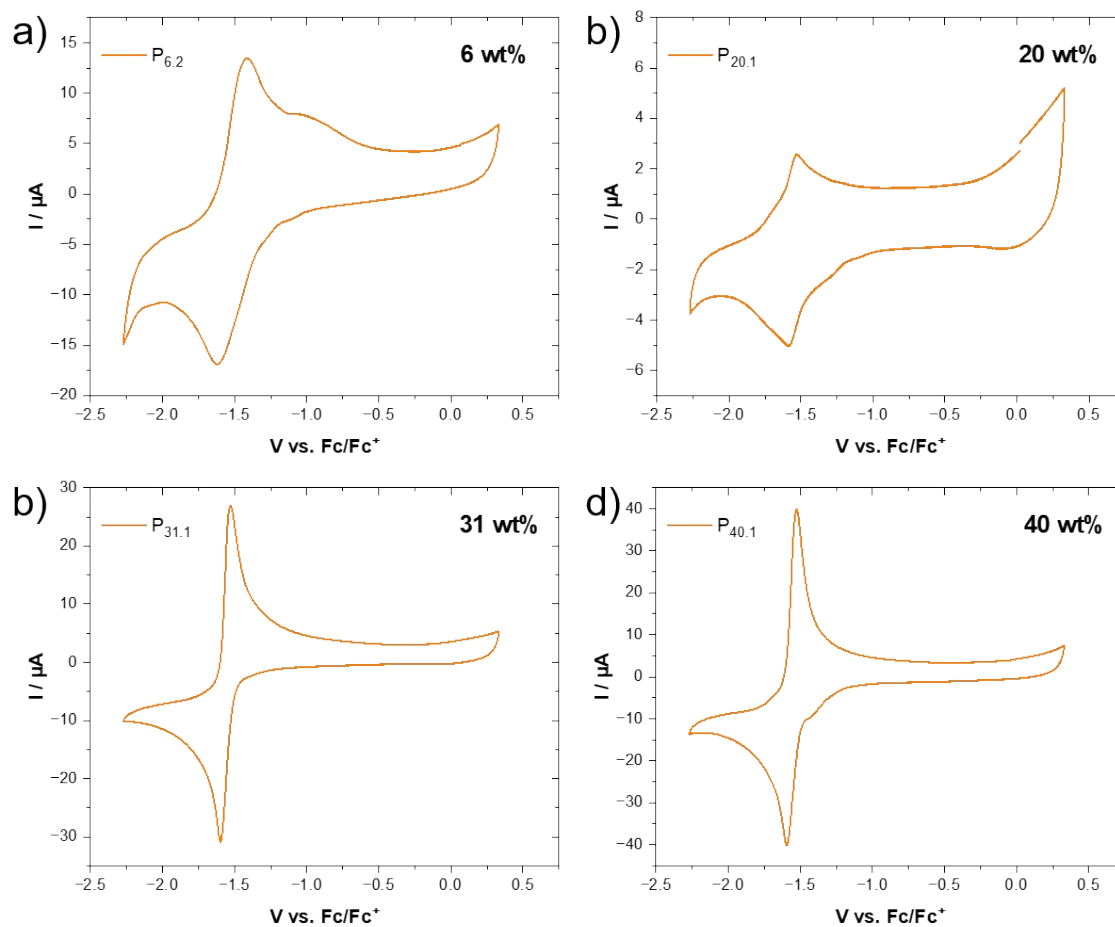

Figure S16: Cyclic voltammetry (CV) investigation of cobaltocenium containing BCP- films in acetonitrile with 0.1 M TBAPF<sub>6</sub> at a scan rate of  $200 \text{ mV s}^{-1}$ , Pt working, and Ag/AgCl reference electrode containing increasing cobaltocenium amounts (P<sub>xx</sub> wt%): a) P<sub>6.2</sub>. b) P<sub>20.1</sub>. c) P<sub>31.1</sub>. d) P<sub>40.1</sub>.

7.-Thermogravimetric Analysis Data and Ceramic in Synthetic Air

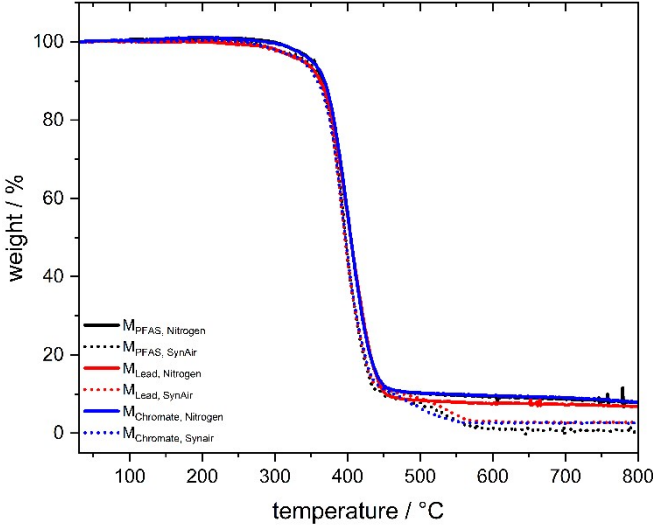

Figure S  
800°C with 10 K min<sup>-1</sup>.

air up to

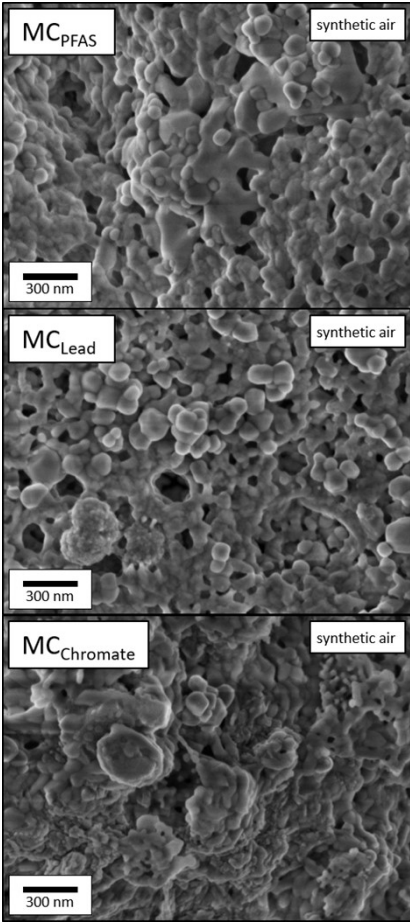

Figure S18: Scanning electron microscopy (SEM) images of the ceramic membrane after calcination in synthetic air up to 800°C with 10 K min<sup>-1</sup> of PFAS ( $M_{PFAS}$ ), sodium chromate ( $M_{Chromate}$ ) and lead nitrate ( $M_{Lead}$ ) retention experiments.

## 8.-Ceramic Composition and Mapping via Energy-dispersive X-ray Spectroscopy (EDS)

Table S2: Summary of elemental composition of membrane ceramic formed after calcination in nitrogen and synAir up to 800°C with 10 K min<sup>-1</sup> determined by energy-dispersive X-ray spectroscopy (EDS)

| Sample                         | Atmosphere <sup>a)</sup> | Ceramic yield / wt% | C / wt% | O / wt% | P / wt% | Co / wt% | Cr / wt% |
|--------------------------------|--------------------------|---------------------|---------|---------|---------|----------|----------|
| M <sub>PFOA</sub> . N2         | nitrogen                 | 7.9                 | 56.2    | 19.0    | 8.3     | 16.5     | 0        |
| M <sub>PFOA</sub> . SynAir     | synAir                   | [0.47]              | 15.5    | 44.0    | 14.8    | 25.8     | 0        |
| M <sub>Lead</sub> . N2         | nitrogen                 | 6.9                 | 65.9    | 19.4    | 4.8     | 9.9      | 0        |
| M <sub>Lead</sub> . SynAir     | synAir                   | 2.8                 | 16.3    | 34.9    | 14.7    | 34.1     | 0        |
| M <sub>Chromate</sub> . N2     | nitrogen                 | 7.9                 | 69.9    | 18.8    | 3.1     | 6.7      | 1.5      |
| M <sub>Chromate</sub> . SynAir | synAir                   | 2.7                 | 12.3    | 36.5    | 14.2    | 31.4     | 3.2      |

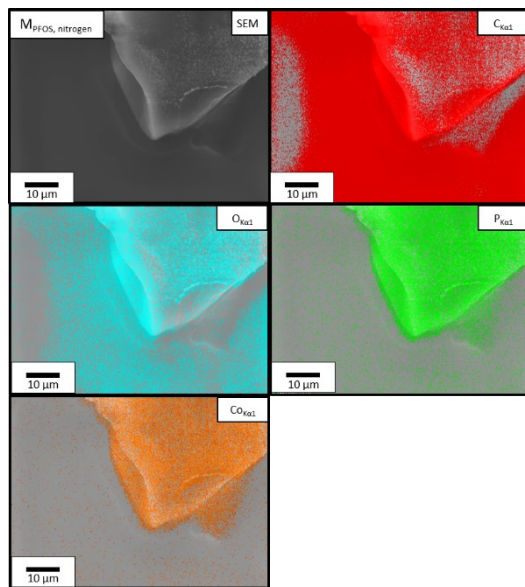

Figure S19: Energy-dispersive X-ray spectroscopy (EDS) images of respective elements found for M<sub>PFOA</sub> made in a nitrogen atmosphere

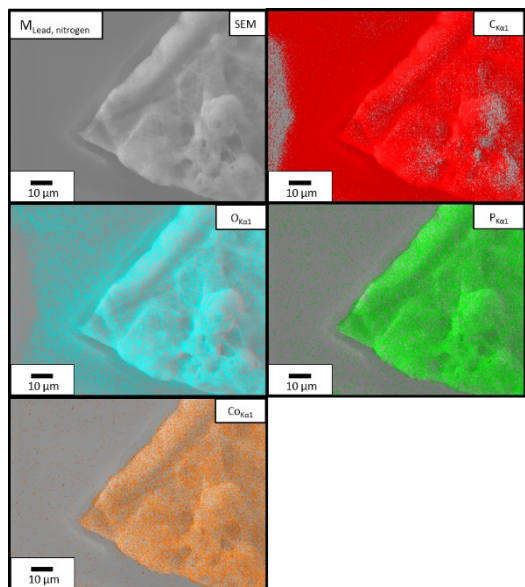

<sup>a)</sup>synAir is a mixture of nitrogen and oxygen (80/20).

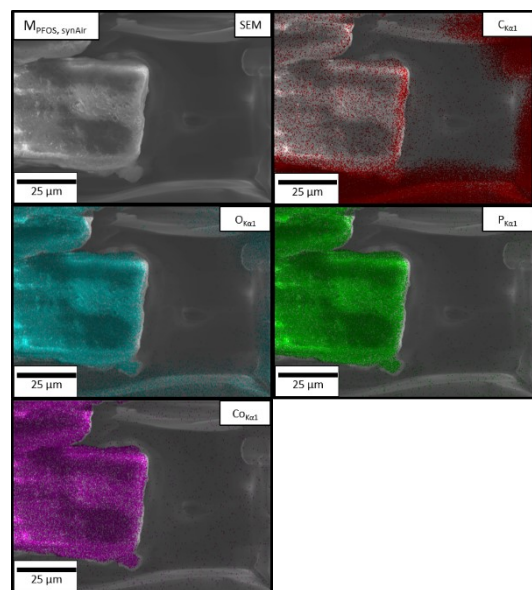

Figure S20: Energy-dispersive X-ray spectroscopy (EDS) images of respective elements found for M<sub>PFOA</sub> made in an oxidative atmosphere

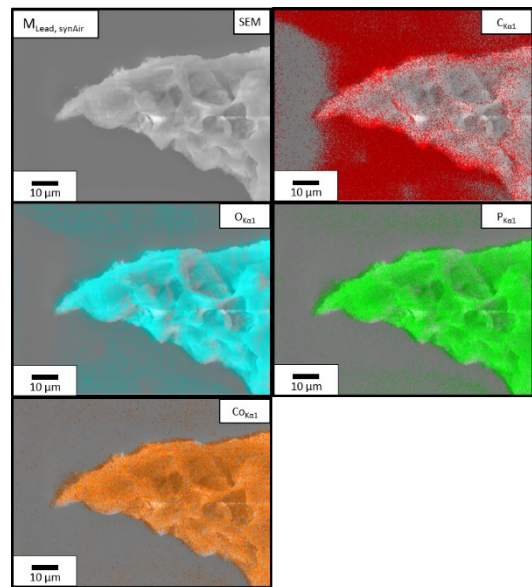

Figure S22: Energy-dispersive X-ray spectroscopy (EDS) images of respective elements found for M<sub>Lead</sub> made in an oxidative atmosphere

Figure S21: Energy-dispersive X-ray spectroscopy (EDS) images of respective elements found for M<sub>Lead</sub> made in a nitrogen atmosphere

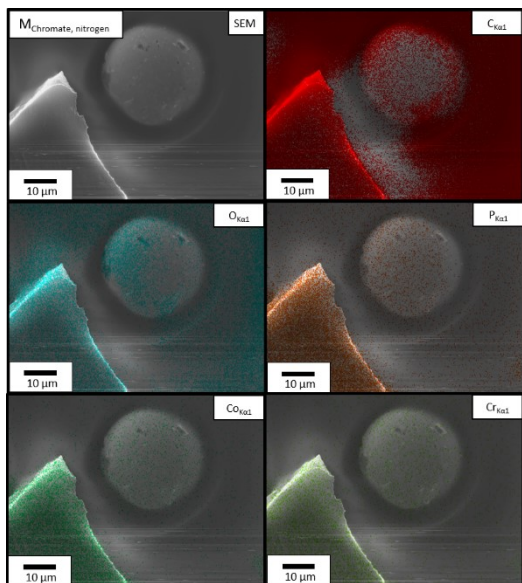

Figure S23: Energy-dispersive X-ray spectroscopy (EDS) images of respective elements found for  $M_{\text{Chromate}}$  made in a nitrogen atmosphere

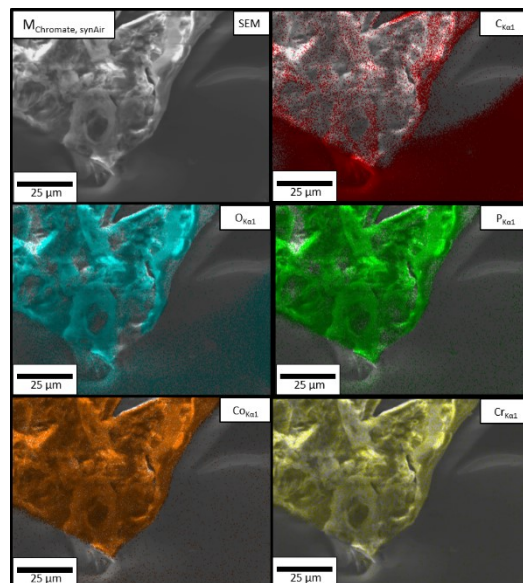

Figure S24: Energy-dispersive X-ray spectroscopy (EDS) images of respective elements found for  $M_{\text{Chromate}}$  made in an oxidative atmosphere
